# Supplementary material for: A scoping review on the relationship between robotics in educational contexts and e-health
Source: Frontiers journal article supplement (doi:10.3389/feduc.2022.955572), 2022-11-02
Supplement: Data_Sheet_1.xlsx [file Data_Sheet_1.xlsx]

## Sheet: Foglio1
Sannicandro K, De Santis A, Bellini C and Minerva T (2022) A scoping review on the relationship between robotics in educational contexts and e-health. Front. Educ. 7:955572. doi: 10.3389/feduc.2022.955572
Appendix A - Full list of papers obtained from the search of the three strings about ER: (1) teaching and computational thinking, (2) training in the health sector, and (3) education and special needs.
(1) Results for string: Robot AND teaching AND computational thinking
Year	Authors	Title
2017	Palmer H.	Programming in preschool-with a focus on learning mathematics
2017	Chen G., Shen J., Barth-Cohen L., Jiang S., Huang X., Eltoukhy M.	Assessing elementary students’ computational thinking in everyday reasoning and robotics programming
2018	Xia L., Zhong B.	A systematic review on teaching and learning robotics content knowledge in K-12
2018	Chalmers C.	Robotics and computational thinking in primary school
2019	Díaz-Lauzurica B., Moreno-Salinas D.	Computational thinking and robotics: A teaching experience in compulsory secondary education with students with high degree of apathy and demotivation
2019	Esteve-Mon F.M., Adell-Segura J., Nebot M.A.L., Novella G.V., Aparicio J.P.	The development of computational thinking in student teachers through an intervention with educational robotics
2020	Zhong, B., Xia L.	A Systematic Review on Exploring the Potential of Educational Robotics in Mathematics Education
2020	Zhong B., Li T.	Can Pair Learning Improve Students' Troubleshooting Performance in Robotics Education?
2020	Munoz L., Villarreal V., Morales I., Gonzalez J., Nielsen M.	Developing an Interactive Environment through the Teaching of Mathematics with Small Robots
2020	Kert, Serhat Bahadir; Erkoc, Mehmet Fatih; Yeni, Sabiha	The effect of robotics on six graders ' academic achievement, computational thinking skills and conceptual knowledge levels
2020	Rafique M., Hassan M.A., Jaleel A., Khalid H., Bano G.	A Computation Model for Learning Programming and Emotional Intelligence
2020	Angeli C., Valanides N.	Developing young children's computational thinking with educational robotics: An interaction effect between gender and scaffolding strategy
2020	Chevalier M., Giang C., Piatti A., Mondada F.	Fostering computational thinking through educational robotics: a model for creative computational problem solving
2020	Yang K., Liu X., Chen G.	Global research trends in robot education in 2009-2019: A bibliometric analysis
2020	Santos E.A., Lopes L.G.	Learning programming with robots: A study on students’ participation in a virtual community of practice
2020	Yang K., Liu X., Chen G.	The influence of robots on students‟ computational thinking: A literature review
2021	El-Hamamsy L., Chessel-Lazzarotto F., Bruno B., Roy D., Cahlikova T., Chevalier M., Parriaux G., Pellet J.-P., Lanares J., Zufferey J. D., Mondada F.	A computer science and robotics integration model for primary school: evaluation of a large-scale in-service K-4 teacher-training program
2021	Critten V., Hagon H., Messer D.	Can Pre-school Children Learn Programming and Coding Through Guided Play Activities? A Case Study in Computational Thinking
2021	Montes N., Rosillo N., Mora M.C., Hilario L.	A novel real-time matlab/simulink/lego ev3 platform for academic use in robotics and computer science
2021	Sen C., Ay Z.S., Kiray S.A.	Computational thinking skills of gifted and talented students in integrated STEM activities based on the engineering design process: The case of robotics and 3D robot modeling
2021	Jamal N.N., Jawawi D.N.A., Hassan R., Mamat R.	Conceptual Model of Learning Computational Thinking Through Educational Robotic
2021	Diago P.D., González-Calero J.A., Yáñez D.F.	Exploring the development of mental rotation and computational skills in elementary students through educational robotics
2021	Relkin E., de Ruiter L.E., Bers M.U.	Learning to code and the acquisition of computational thinking by young children
2021	Bakala E., Gerosa A., Hourcade J.P., Tejera G.	Preschool children, robots, and computational thinking: A systematic review
2021	Fridberg M., Redfors A.	Teachers’ and children’s use of words during early childhood STEM teaching supported by robotics
2022	Boya-Lara C., Saavedra D., Fehrenbach A., Marquez-Araque A.	Development of a course based on BEAM robots to enhance STEM learning in electrical, electronic, and mechanical domains
2022	Paucar-Curasma R., Villalba-Condori K., Arias-Chavez D., Le N.-T., Garcia-Tejada G., Silveira I.F.	Evaluation of Computational Thinking Using Four Educational Robots with Primary School Students in Peru [Evaluación del pensamiento computacional utilizando cuatro robots educativos con estudiantes de primaria en Perú]
2022	Tengler K., Sabitzer B.	Examining Teachers' Intention to integrate Roboticsbased Storytelling Activities in Primary Schools
2022	Jawawi D.N.A., Jamal N.N., Halim S.A., Sa’adon N.A., Mamat R., Isa M.A., Mohamad R., Hamed H.N.A.	Nurturing Secondary School Student Computational Thinking Through Educational Robotics
2022	Hsieh M.-C., Pan H.-C., Hsieh S.-W., Hsu M.-J., Chou S.-W.	Teaching the Concept of Computational Thinking: A STEM-Based Program With Tangible Robots on Project-Based Learning Courses
2022	Angeli C.	The effects of scaffolded programming scripts on pre-service teachers’ computational thinking: Developing algorithmic thinking through programming robots
2022	Chevalier M., Giang C., El-Hamamsy L., Bonnet E., Papaspyros V., Pellet J.-P., Audrin C., Romero M., Baumberger B., Mondada F.	The role of feedback and guidance as intervention methods to foster computational thinking in educational robotics learning activities for primary school
2022	Merino-Armero J.M., González-Calero J.A., Cózar-Gutiérrez R., Del Olmo-Muñoz J.	Unplugged Activities in Cross-Curricular Teaching: Effect on Sixth Graders’ Computational Thinking and Learning Outcomes
(2) Robotics AND education AND health AND teaching
Year	Authors	Title
2016	Rosi A., Dall'Asta M., Brighenti F., Del Rio D., Volta E., Baroni I., Nalin M., Coti Zelati M., Sanna A., Scazzina F.	The use of new technologies for nutritional education in primary schools: a pilot study
2016	Shire K.A., Hill L.J.B., Snapp-Childs W., Bingham G.P., Kountouriotis G.K., Barber S., Mon-Williams M.	Robot Guided 'Pen Skill' Training in Children with Motor Difficulties
2018	Shim J.S., Kim J.Y., Pyun J.H., Cho S., Oh M.M., Kang S.H., Lee J.G., Kim J.J., Cheon J., Kang S.G.	Comparison of effective teaching methods to achieve skill acquisition using a robotic virtual reality simulator Expert proctoring versus an educational video versus independent training
2018	Hung A.J., Chen J., Shah A., Gill I.S.	Telementoring and Telesurgery for Minimally Invasive Procedures
2018	Hughes-Roberts T., Brown D., Standen P., Desideri L., Negrini M., Rouame A., Malavasi M., Wager G., Hasson C.	Examining engagement and achievement in learners with individual needs through robotic-based teaching sessions
2018	Kun Y., Hubert J., Bin L., Huan W.X.	Self-debriefing Model Based on an Integrated Video-Capture System: An Efficient Solution to Skill Degradation
2019	Beulens A.J.W., Brinkman W.M., Porte P.J., Meijer R.P., van Merriënboer J.J.G., Van der Poel H.G., Wagner C.	The value of a 1-day multidisciplinary robot surgery training for novice robot surgeons
2019	Childs B.S., Manganiello M.D., Korets R.	Novel Education and Simulation Tools in Urologic Training
2019	Beulens A.J.W., Brinkman W.M., Van der Poel H.G., Vis A.N., van Basten J.P., Meijer R.P., Wijburg C.J., Hendrikx A.J.M., van Merriënboer J.J.G., Wagner C.	Linking surgical skills to postoperative outcomes: a Delphi study on the robot-assisted radical prostatectomy
2019	Green CA., Mahuron K.M., Harris H.W., O'Sullivan P.S.	Integrating Robotic Technology Into Resident Training: Challenges and Recommendations From the Front Lines
2020	Lindsay S.	Exploring Skills Gained Through a Robotics Program for Youth With Disabilities
2020	Harris C.A., Guerri L., Mircic S., Reining Z., Amorim M., Jovic D., Wallace W., DeBoer J., Gage G.J.	Neurorobotics Workshop for High School Students Promotes Competence and Confidence in Computational Neuroscience
2021	Adorisio O., Silveri M., Torino G.	Evaluation of educational value of YouTube videos addressing robotic pyeloplasty in children
2021	Yu N., Saadat H., Finelli A., Lee J.Y., Singal R.K., Grantcharov T.P., Goldenberg M.G.	Quantifying the “Assistant Effect” in Robotic-Assisted Radical Prostatectomy (RARP): Measures of Technical Performance
2021	Robaczewski A., Bouchard J., Bouchard K., Gaboury S.	Socially Assistive Robots: The Specific Case of the NAO
(3) Results for string: Robotics AND education AND special needs
Year	Authors	Title
2016	Potkonjak V., Gardner M., Callaghan V., Mattila P., Guetl C., Petrovic V.M., Jovanovic K.	Virtual laboratories for education in science, technology, and engineering: A review
2017	Anisimova T.I., Latipova L.N., Sergeeva A.B., Sharafeeva L.R., Shatunova O.V.	Formation Of Teachers' Readiness To Work With Technically Gifted Children
2019	Alcorn A.M., Ainger E., Charisi V., Mantinioti S., Petrovic S., Schadenberg B.R., Tavassoli T., Pellicano E.	Educators' Views on Using Humanoid Robots With Autistic Learners in Special Education Settings in England
2019	Bargagna S., Castro E., Cecchi F., Cioni G., Dario P., Dell'Omo M., Di Lieto M.C., Inguaggiato E., Martinelli A., Pecini C., Sgandurra G.	Educational Robotics in Down Syndrome: A Feasibility Study
2019	Catlin D., Blamires M.	Designing Robots for Special Needs Education
2019	Scaradozzi D., Screpanti L., Cesaretti L., Storti M., Mazzieri E.	Implementation and Assessment Methodologies of Teachers' Training Courses for STEM Activities
2020	Aniskin V.N., Korostelev A.A., Lvovna B.A., Kurochkin A.V., Sobakina T.G.	Teaching potential of integrated learning technologies Smart, Stem and Steam
2021	Chootongchai S., Songkram N., Piromsopa K.	Dimensions of robotic education quality: teachers' perspectives as teaching assistants in Thai elementary schools
2021	Schina D., Esteve-Gonzalez V., Usart M.	An overview of teacher training programs in educational robotics: characteristics, best practices and recommendations
2022	Ao Y.T., Yu Z.G.	Exploring the Relationship between Interactions and Learning Performance in Robot-Assisted Language Learning
2022	Fridberg M., Redfors A., Greca I.M., Terceno E.M.G.	Spanish and Swedish teachers' perspective of teaching STEM and robotics in preschool - results from the botSTEM project
